# Supplementary material
Source: PubMed Central journal article supplement (PMC3248502)
Supplement: 1118357109_pnas.201118357SI.pdf [file 1118357109_pnas.201118357SI.pdf]

# Supporting Information

Logan et al. 10.1073/pnas.1118357109

## SI Materials and Methods

**CLL Cell Isolation, Flow Cytometry, and DNA Isolation.** Peripheral blood samples were acquired from patients at indicated time points following HCT, and the mononuclear cell fraction (PBMC) was cryopreserved in 10% dimethyl sulfoxide (DMSO) after separation on a Ficoll-Hypaque (Sigma-Aldrich) density gradient. Flow cytometric assessment of MRD was achieved by quantifying live lymphocytes [Live/Dead Aqua (Invitrogen) negative] bearing the CLL immunophenotype (low forward/side scatter, CD45<sup>+</sup> CD3<sup>neg</sup> CD56<sup>neg</sup> CD14<sup>neg</sup> CD19<sup>+</sup> CD5<sup>+</sup> CD23<sup>+</sup>) with a median 500,000 events for live cells collected (range 150,000–500,000) on a LSRII flow cytometer (Becton Dickinson). For our dilution series experiment, we purified CLL cells with the above immunophenotype from one patient to >98% purity using an InFlux flow cytometer (Becton Dickinson). These purified CLL cells were diluted into healthy donor PBMC from 1:10 down to 1:100,000. DNA was harvested after washing with buffered saline (pH 7.4), cellular disruption in lysis buffer (50 mM Tris-HCl, 50 mM EDTA, and 1% SDS; pH 7.4) containing proteinase K, followed by phenol extraction, ethanol precipitation, and resuspension in Tris-EDTA buffer (pH 7.4). When comparing MRD quantification by IGH-HTS and FC, we converted the flow cytometric quantification from CLL phenotype cells per microliter of blood to CLL cells per microgram of genomic DNA based on a diploid human genome mass of 6.49 pg per cell.

**ASO-PCR.** Quantitative real-time PCR was performed by using patient ASO primers as described (1). With this technique, an IGH V-region consensus probe was used with patient-specific primers, one of which anneals to the clonal complementarity determining region 3 (CDR3). When the consensus probe yielded insufficient sensitivity, patient allele-specific probes spanning the CDR3 region were used. Q-PCR reactions were performed on an ABI 7900 thermocycler (Applied Biosystems) by using AmpliTaq Gold DNA polymerase (Applied Biosystems).

**Data Analysis.** Sequence reads were mapped to germ-line V and J reference sequences downloaded from the IMGT Web site ([www.imgt.org](http://www.imgt.org)) (2) with a method described by Wang et al. (3). Briefly, the IRmap program, a modification of Smith–Waterman algorithm (4), was used to search for the germ-line V and J gene segments for best matches while taking the sequence read quality score at each base into account. Each sequence read was then

assigned with the best-matched V and J segments. Reads mapped with <20 V bases or 15 J bases—most, if not all of which were primer-dimers or other PCR artifacts—were eliminated. We analyzed reads through 200 nt to ensure averaged sequence quality score was >35 at every position (Fig. S1).

For MRD quantification, reads with identical V and J segment use and with <20 nucleotide differences from the dominant CLL clone, previously determined for every CLL patient from a traditional Sanger sequencing read performed for CLL prognostication, were retained for further analysis. 454 pyrosequencing is error-prone at homopolymeric regions and produces primarily insertion and deletion (indel) errors (4). To avoid undercounting the cancer clone, a rescue procedure was designed to salvage reads differing at homopolymeric regions. After aligning each read with the dominant CLL clone, each homopolymer region with three or more of the same nucleotide in succession were identified in pairwise alignment. Insertions, deletions, or substitutions of one or two nucleotides around each homopolymer were adjusted according to the dominant clone sequence. Multiple sequence alignments of clones and potentially related subclones were then performed by using the ClustalW2 algorithm ([www.ebi.ac.uk/Tools/clustalw2/index.html](http://www.ebi.ac.uk/Tools/clustalw2/index.html)) with default parameters (5).

Alignment of sequencing reads corrected for homopolymeric indels and substitutions led to discovery of random single-nucleotide indels at low frequencies, which likely also resulted from pyrosequencing errors (6). These indels were removed according to the dominant CLL clonotype for each patient. We then analyzed the resulting sequence alignments for MRD quantification and phylogenetic analysis. Sequencing reads that differed by up to one nucleotide substitution or gap were aggregated into the final CLL MRD count. Remaining reads with two or more nucleotide substitutions or gaps were analyzed for their relationship to the dominant CLL clone if their clonal frequency was two or greater and they were observed in at least two samples from each patient. By using these stringent criteria, artifactual clonotypes were minimized in the phylogenetic analysis. Neighbor-joining phylogenetic trees were constructed by using unrooted methods implemented in Phylip ([evolution.gs.washington.edu/phylip.html](http://evolution.gs.washington.edu/phylip.html)) with default parameters (7) and were plotted with the APE R package ([ape.mpl.ird.fr](http://ape.mpl.ird.fr)) (8).

1. Ladetto M, et al. (2000) Real-time polymerase chain reaction of immunoglobulin rearrangements for quantitative evaluation of minimal residual disease in multiple myeloma. *Biol Blood Marrow Transplant* 6:241–253.
2. Giudicelli V, Chaume D, Lefranc MP (2005) IMGT/GENE-DB: A comprehensive database for human and mouse immunoglobulin and T cell receptor genes. *Nucleic Acids Res* 33 (Database issue):D256–D261.
3. Wang C, et al. (2010) High throughput sequencing reveals a complex pattern of dynamic interrelationships among human T cell subsets. *Proc Natl Acad Sci USA* 107:1518–1523.
4. Wang C, Mitsuya Y, Gharizadeh B, Ronaghi M, Shafer RW (2007) Characterization of mutation spectra with ultra-deep pyrosequencing: Application to HIV-1 drug resistance. *Genome Res* 17:1195–1201.
5. Chenna R, et al. (2003) Multiple sequence alignment with the Clustal series of programs. *Nucleic Acids Res* 31:3497–3500.
6. Nguyen P, et al. (2011) Identification of errors introduced during high throughput sequencing of the T cell receptor repertoire. *BMC Genomics* 12:106.
7. Retief JD (2000) Phylogenetic analysis using PHYLIP. *Methods Mol Biol* 132:243–258.
8. Paradis E, Claude J, Strimmer K (2004) APE: analysis of phylogenetics and evolution in R language. *Bioinformatics* 20:289–290.

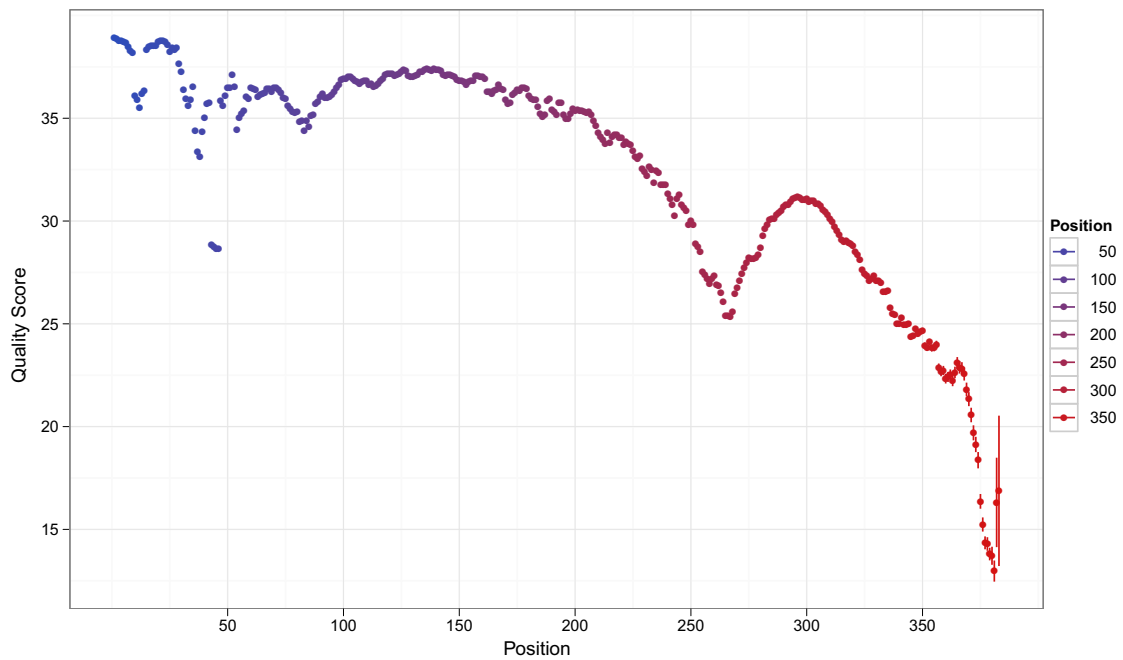

**Fig. S1.** Sequence quality scores by nucleotide position. The median sequence quality score at each position across the entire 454 pyrosequencing dataset demonstrate that sequence quality degraded after position 200.

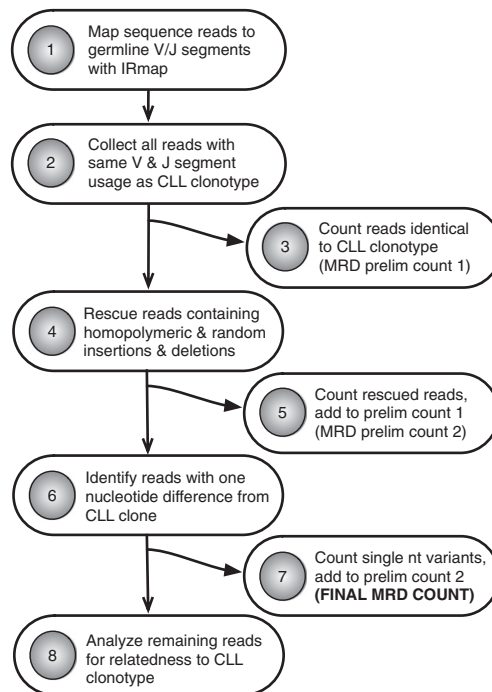

**Fig. S2.** 454 pyrosequencing error handling algorithm. An algorithm for systematically handling 454 pyrosequencing errors was developed. Final MRD counts were an aggregation of reads identical to the dominant CLL clonotypes (step 3), reads corrected for homopolymeric and random single-nucleotide (nt) indels (step 5), and reads containing up to one nt substitution or gap (step 7). Remaining reads were analyzed for subclonal phylogenetic relationships.

Patient SPN3740

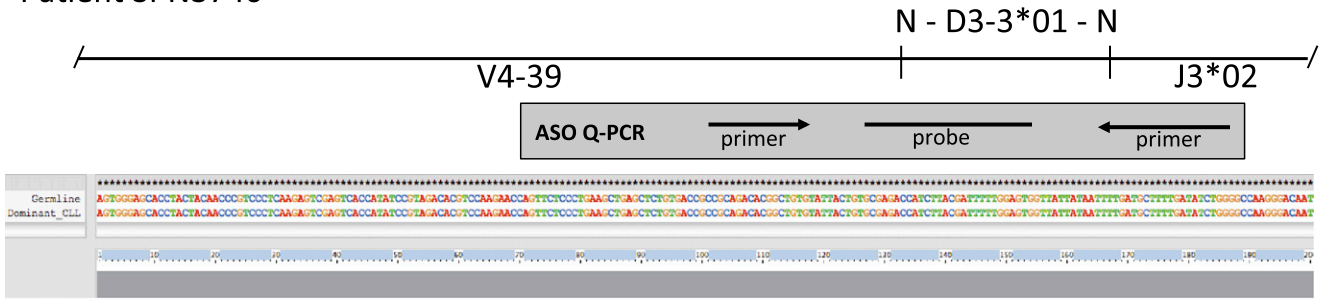

Patient SPN3751

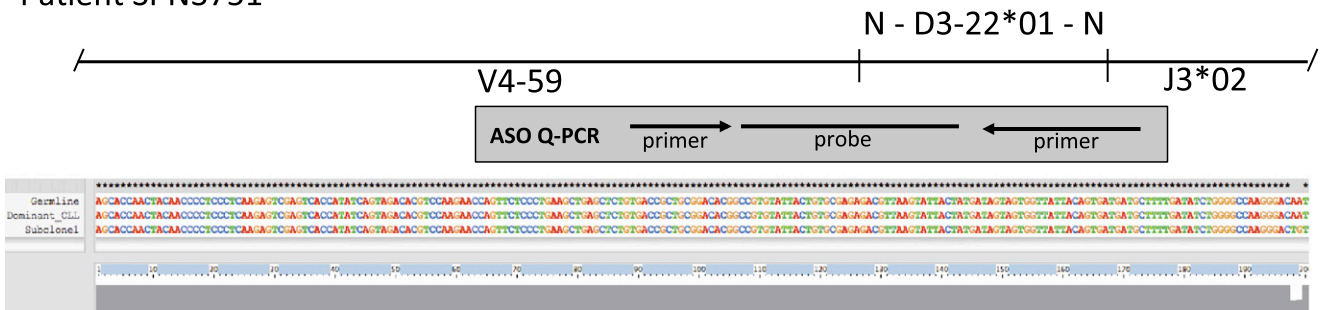

Patient SPN3860

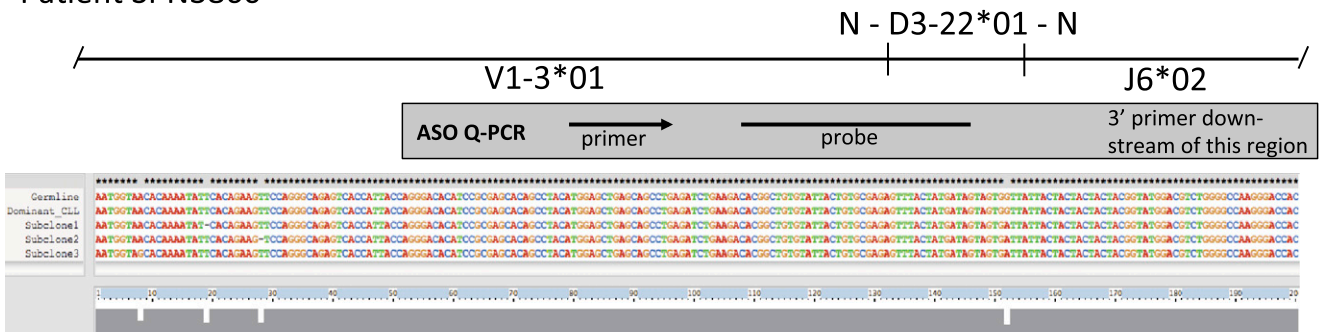

Patient SPN3873

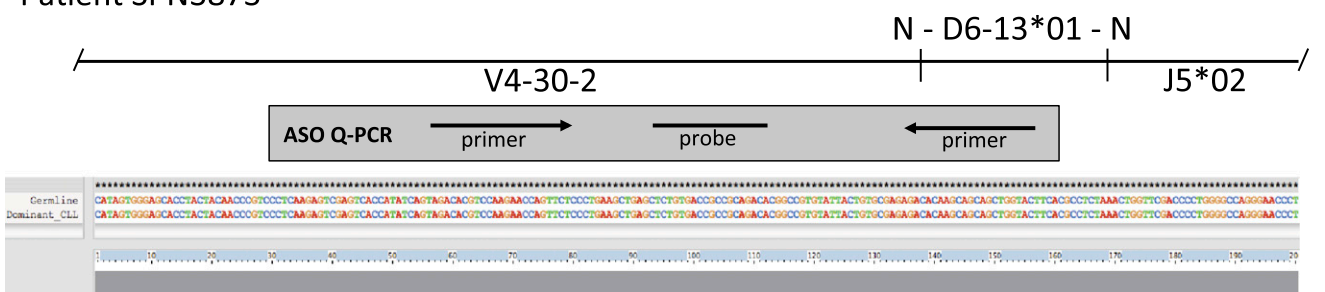

Fig. S3. (Continued)

Patient SPN3975

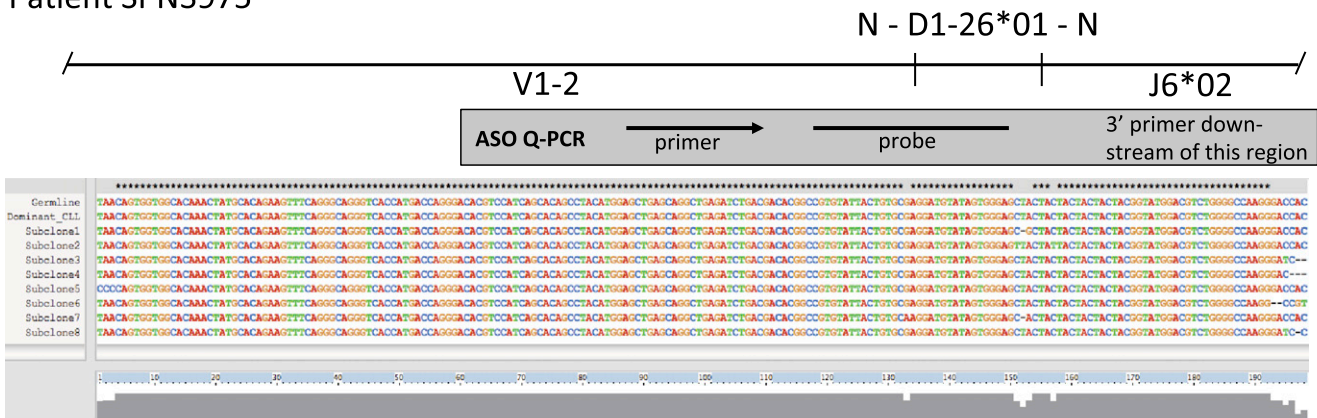

Patient SPN4077

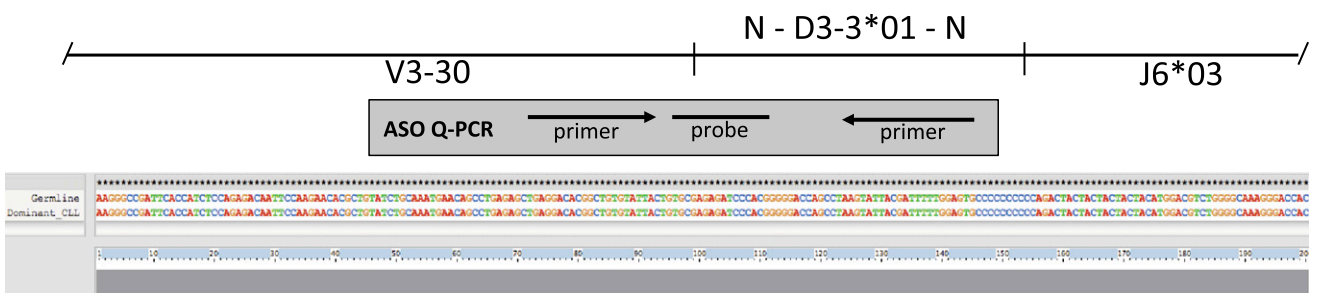

**Fig. S3.** Subclone sequence alignments. Sequence alignments of the dominant CLL clonotypes (Dominant\_CLL) for each patient with the concordant IMGT consensus germ-line sequences are shown in ClustaX output. For those patients with legitimate subclones, their sequence alignment is also shown. Missing asterisks above the nucleotide sequence indicate positions at which nucleotide substitutions or gaps were found. The inverted histogram beneath the sequence position markers indicates the relative number of mutated clonotypes found at each position. The annealing sites for each patient's ASO-PCR primers and probes are depicted to demonstrated their position relative to mutation sites in subclones.

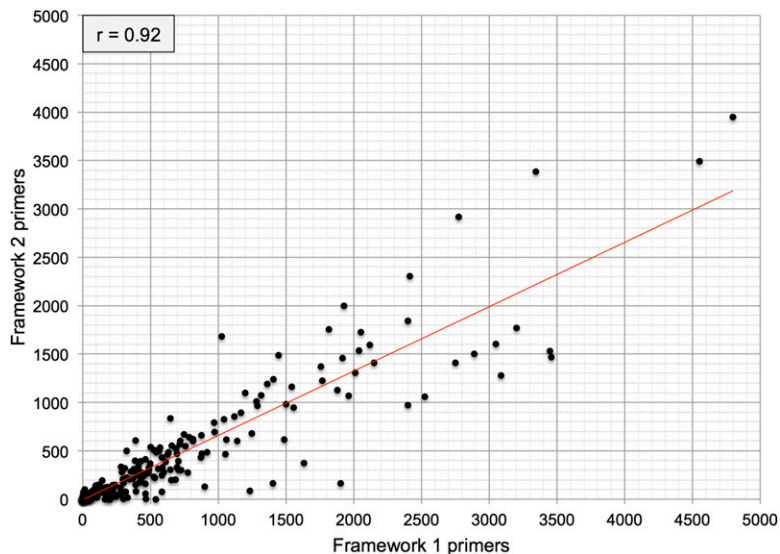

**Fig. S4.** Concordance of IGH repertoire coverage using FR1-J and FR2-J amplimers. Each position on the graph represents the number of times a specific clonotype was seen with each primer set. The Pearson  $r$  correlation coefficient was 0.92.

# Patient SPN3740

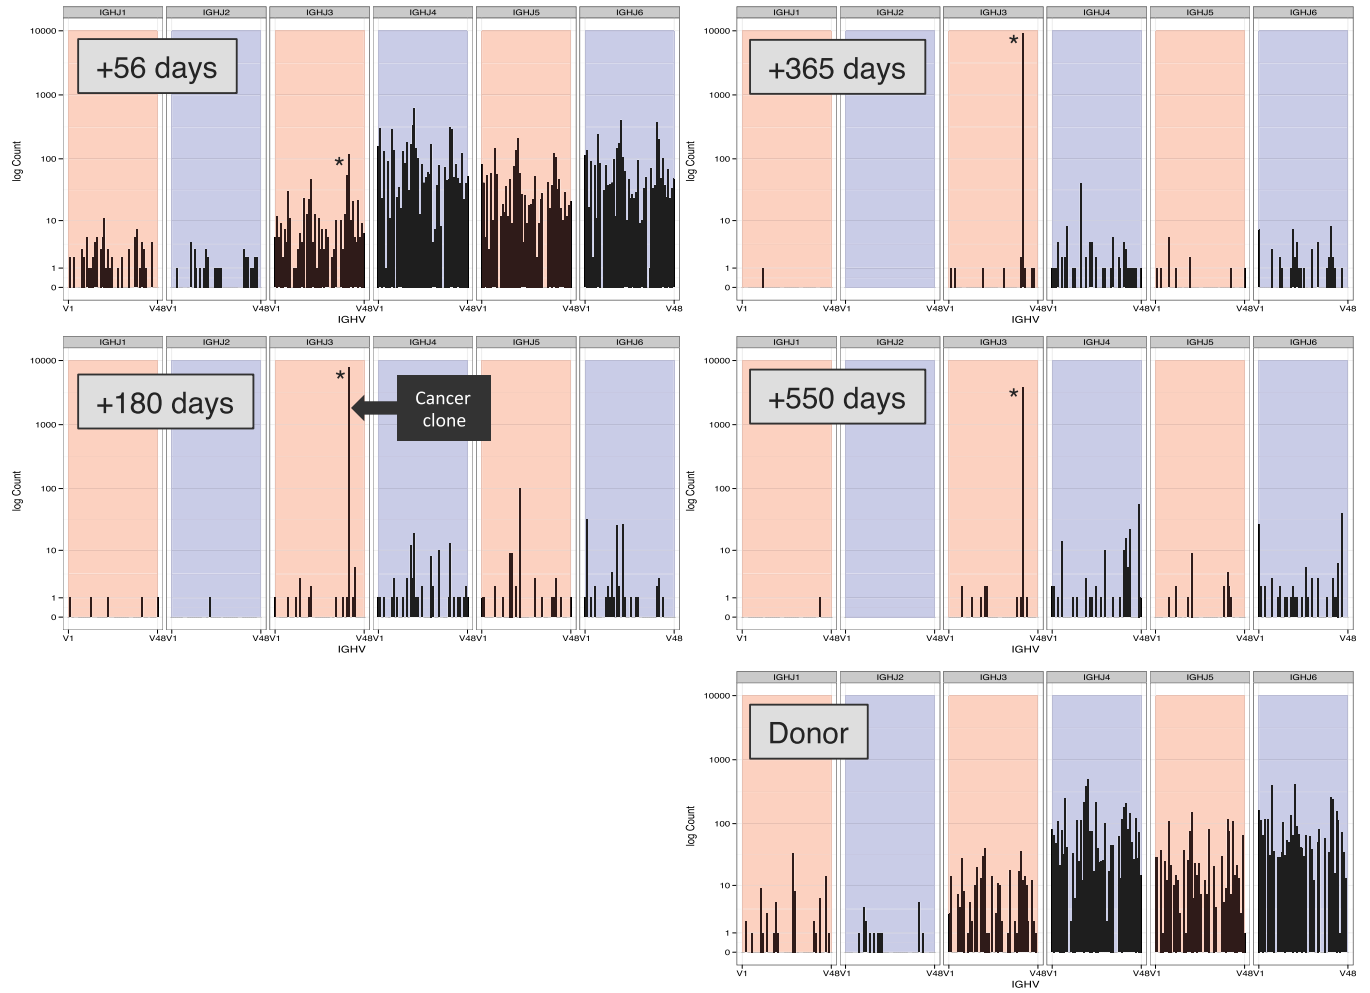

Fig. S5. (Continued)

# Patient SPN3751

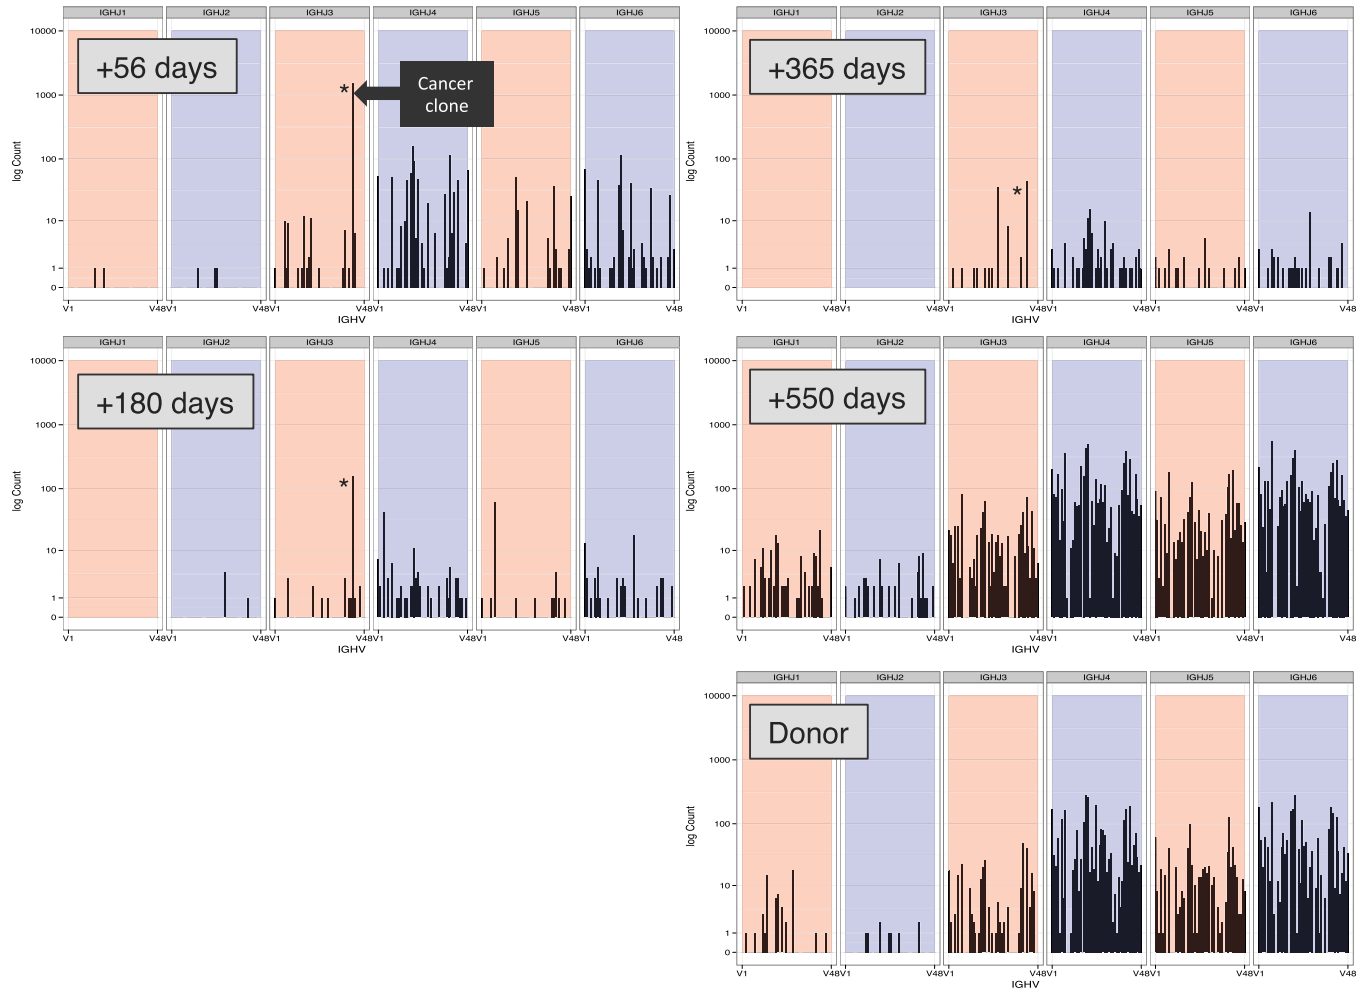

Fig. S5. (Continued)



# Patient SPN3860

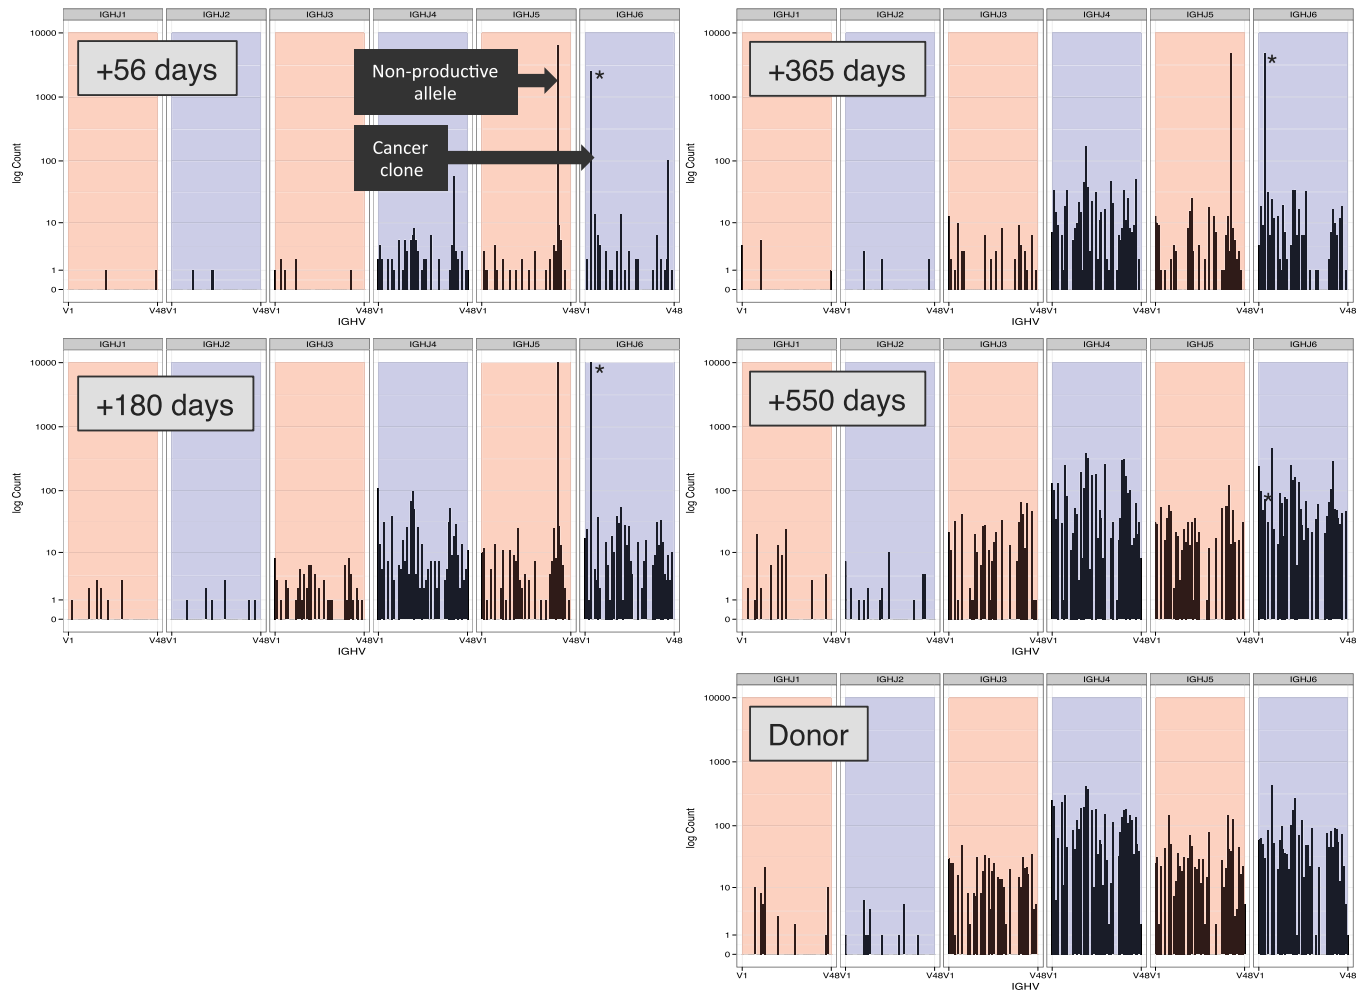

Fig. S5. (Continued)

# Patient SPN3873

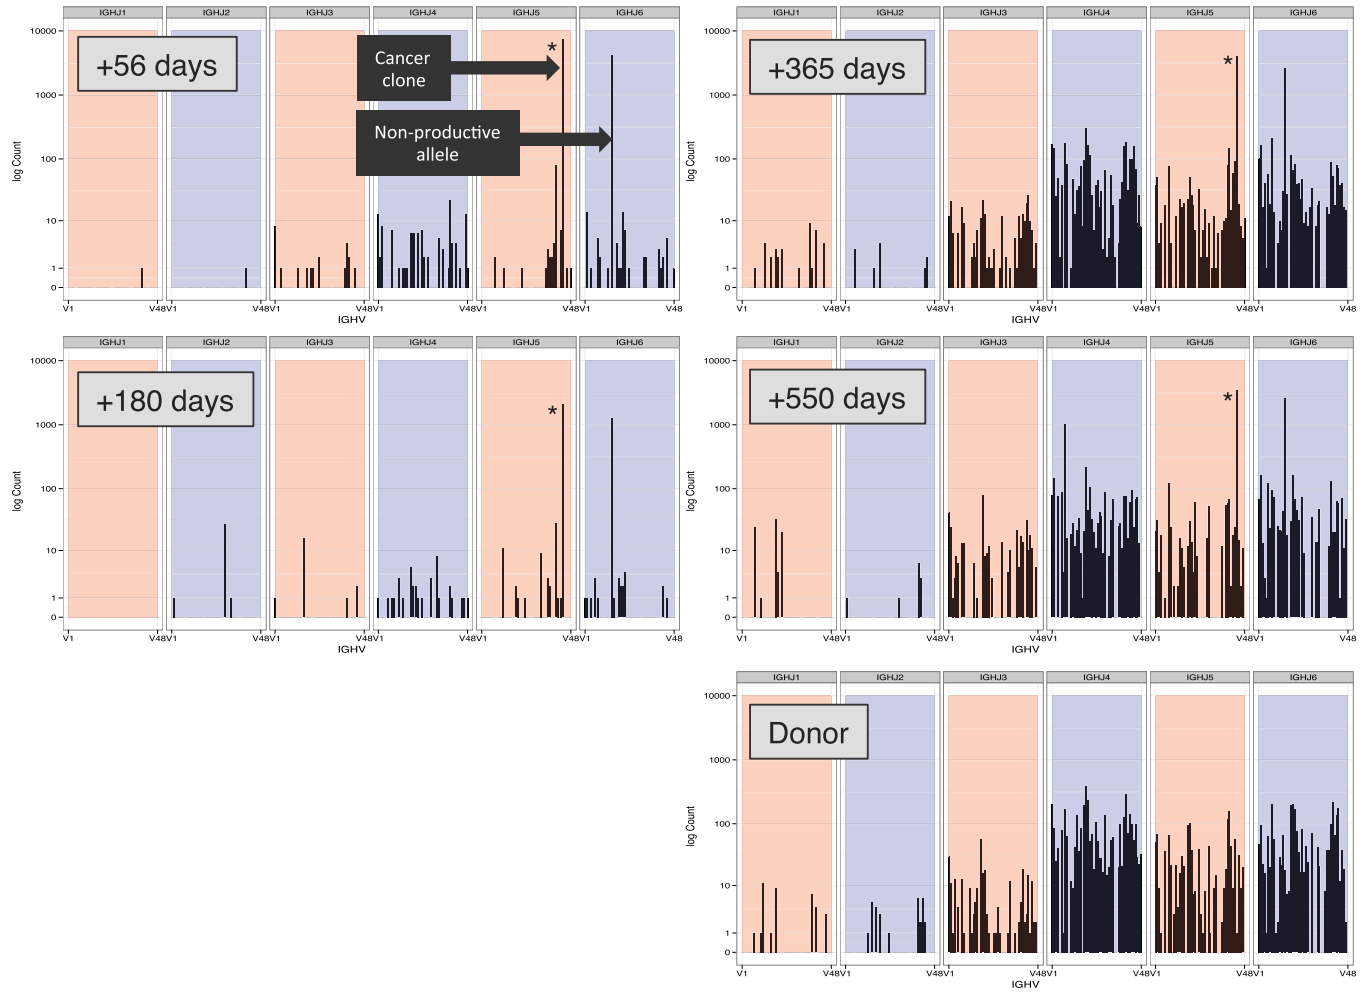

Fig. S5. (Continued)



# Patient SPN3975

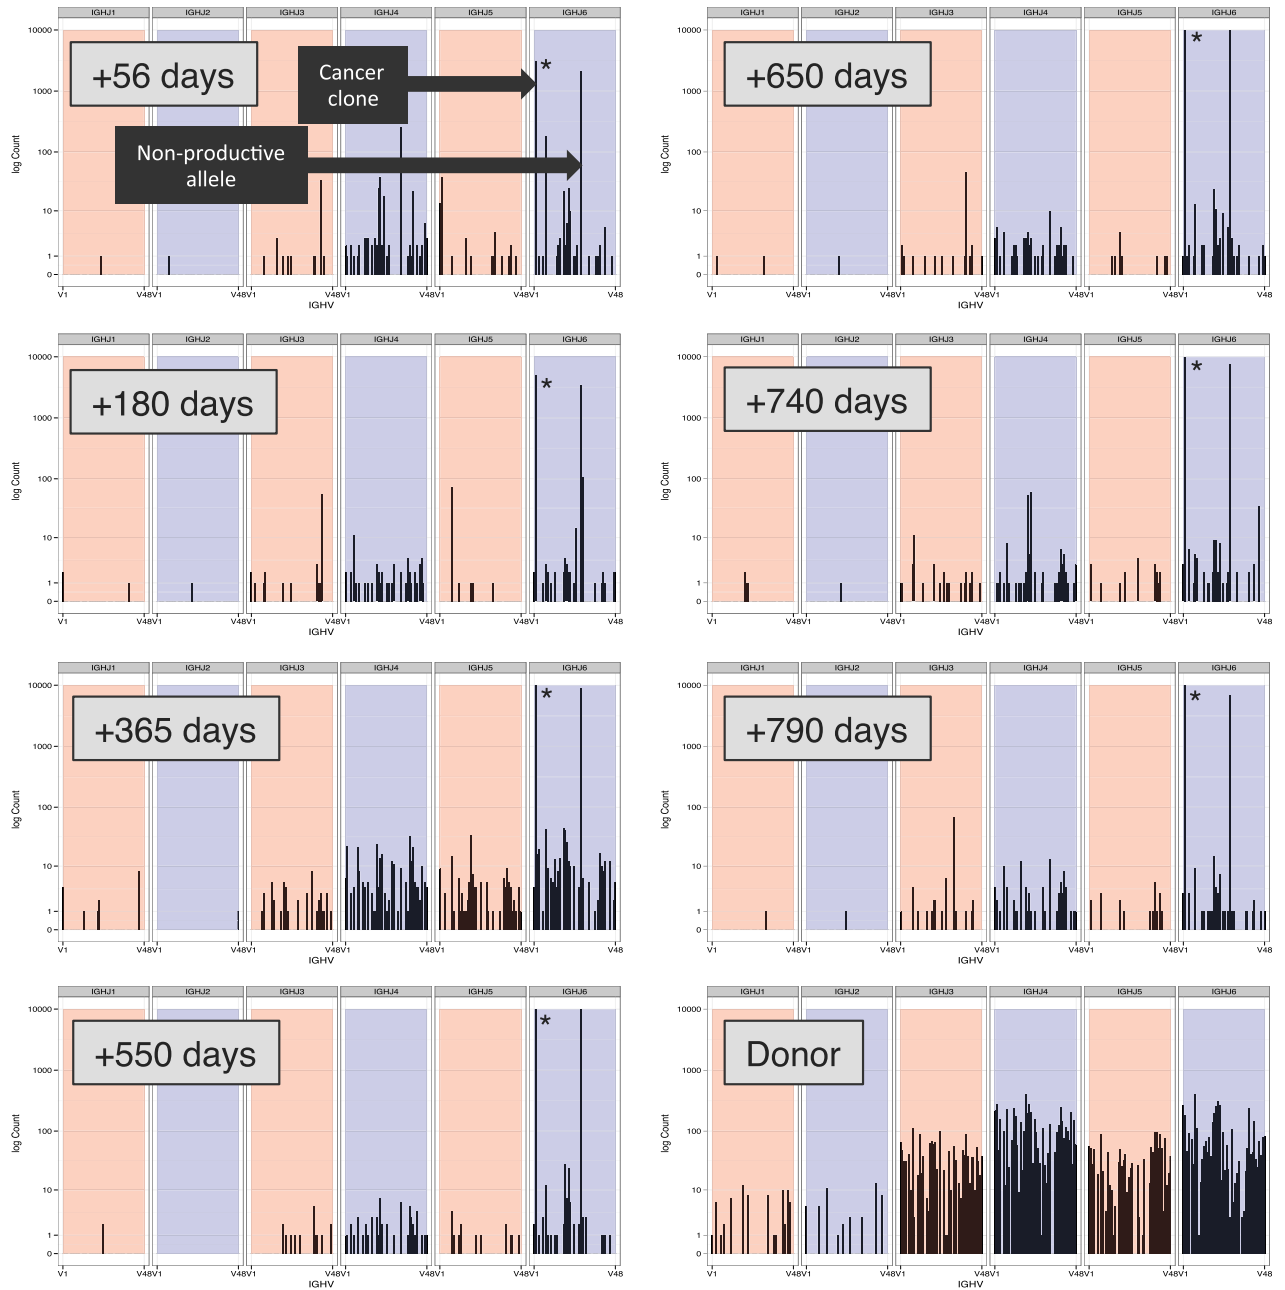

**Fig. S5.** IGH-HTS reveals kinetics of IGH repertoire reconstitution following allo-HCT for CLL. All V-J recombinations detected in peripheral blood from patients at days +56, +180, +365, and +550 following allo-HCT are demonstrated. The x axis at the bottom of each section represents the IgH V segments 1–49 which combined with IgH J segments 1–6 as defined along the x axis at the top of each section. The y axis represents the number of total reads for that recombination pair. The repertoire of each patient’s donor is demonstrated for comparison. The CLL clonotype is demarcated by an asterisk.

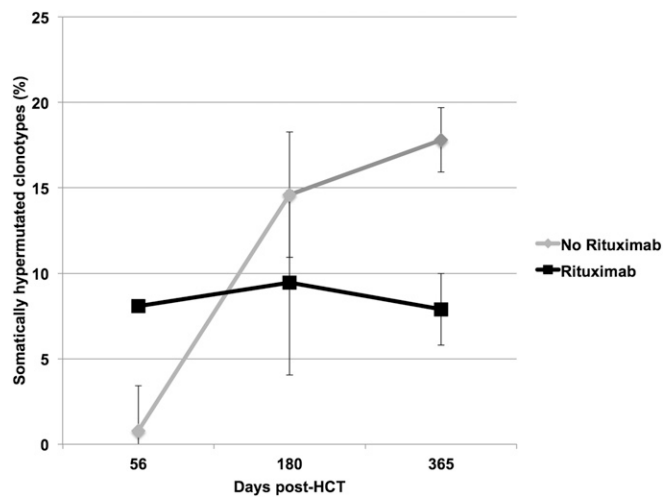

**Fig. 56.** IGH-HTS reveals effects of posttransplant anti-B-cell therapy on IGH repertoire reconstitution. The degree of somatic hypermutation across the entire IGH repertoire in patients who did ( $n = 4$ ) or did not ( $n = 2$ ) receive posttransplant Rituximab for GVHD prophylaxis is demonstrated at days +56, +180, and +365 following allotransplant.

**Table S1. Patient characteristics**

| Patient characteristics |               |     | CLL disease features |               |         |        | CLL status at transplant |               |                       |                        |                   |            |                           |                     |                         |
|-------------------------|---------------|-----|----------------------|---------------|---------|--------|--------------------------|---------------|-----------------------|------------------------|-------------------|------------|---------------------------|---------------------|-------------------------|
| SPN                     | Age at CLL dx | Sex | Cyto by FISH         | Flud refract* | CLL IGH | VH     | JH                       | Max Rai stage | No. of prior regimens | Alemtuzamab before HCT | CLL status at HCT | WBC at HCT | Bone marrow CLL as % CD45 | LN >5 cm before HCT | Time from dx to HCT, mo |
| 3740                    | 48            | F   | 17p-                 | Yes           | Unmut   | 4-39   | 3                        | IV            | 5                     | No                     | PR3               | 4.0        | 80                        | Yes                 | 128                     |
| 3751                    | 53            | M   | 17p-                 | Yes           | Unmut   | 4-59   | 3                        | IV            | 6                     | Yes                    | PR2               | 7.0        | 1                         | No                  | 43                      |
| 3860                    | 55            | M   | nl                   | Yes           | Unmut   | 1-3    | 6                        | IV            | 6                     | Yes                    | PR4               | 6.0        | 22                        | No                  | 84                      |
| 3873                    | 50            | F   | 13q-                 | No            | Unmut   | 4-22   | 5                        | III           | 4                     | Yes                    | PR4               | 3.3        | 50                        | No                  | 82                      |
| 3975                    | 43            | M   | 17p-                 | Yes           | Unmut   | 1-2    | 6                        | III           | 3                     | Yes                    | CR3               | 1.6        | 0                         | No                  | 60                      |
| 4077                    | 51            | M   | 11q-                 | No            | Unmut   | 3-30-3 | 6                        | II            | 2                     | No                     | CR2               | 6.8        | 0                         | No                  | 72                      |

CR, complete response; Cyto by FISH, cytogenetics determined by FISH; dx, diagnosis; F, female; Flud refract, fludarabine refractory; IGH, heavy chain Ig; JH, junctional heavy chain; max, maximum; LN, lymph node; M, male; PR, partial response; SPN, Stanford patient number; VH, variable heavy chain; Unmut, unmutated IGH CLL clone (CLL IGH sequence varies by <2% from germ line); WBC, white blood cell. \*Defined as failure to achieve a partial response or complete response to at least one fludarabine-containing regimen, disease progression while on fludarabine treatment, or disease progression within 6 mo of the last dose of fludarabine.

**Table S2. Hematopoietic cell transplant clinical outcomes**

| SPN  | Pt characteristics |     |     | Donor characteristics |          |          | Transplant characteristics |                    |               | GVHD    |        |        | Donor CD3 T-cell chimerism, % |         |                         | CLL disease response       |  |  |
|------|--------------------|-----|-----|-----------------------|----------|----------|----------------------------|--------------------|---------------|---------|--------|--------|-------------------------------|---------|-------------------------|----------------------------|--|--|
|      | Age at HCT         | Sex | Sex | Sex                   | Relation | Relation | No. of CD34+ cells per rec | Post-HCT Rituximab | Acute (grade) | Chronic | Day 30 | Day 90 | Time to relapse, d            | DLI day | CLL status 3 y post-HCT | Current status, d post-HCT |  |  |
| 3740 | 58                 | F   | M   | M                     | Sibling  | Sibling  | 12.5 × 10 (6)              | Yes                | 0             | None    | 93     | 84     | 182                           | 206     | Died of tCLL            | Died, 646                  |  |  |
| 3751 | 56                 | M   | M   | M                     | Unrel.   | Unrel.   | 13.3 × 10 (6)              | Yes                | 0             | Exten.  | 92     | 99     | 1,120                         | 1,180   | PD                      | Alive, 1,587               |  |  |
| 3860 | 62                 | M   | M   | M                     | Unrel.   | Unrel.   | 9.2 × 10 (6)               | No                 | 1             | Exten.  | 32     | 64     | None                          | None    | CR                      | Alive, 1,426               |  |  |
| 3873 | 59                 | F   | M   | M                     | Sibling  | Sibling  | 5.7 × 10 (6)               | Yes                | 0             | None    | 86     | 88     | 798                           | 840     | CR                      | Alive, 1,398               |  |  |
| 3975 | 48                 | M   | F   | M                     | Sibling  | Sibling  | 7.4 × 10 (6)               | Yes                | 0             | Exten.  | 91     | 60     | 210                           | 301     | PD                      | Alive, 1,237               |  |  |
| 4077 | 57                 | M   | M   | M                     | Unrel.   | Unrel.   | 13.3 × 10 (6)              | No                 | 0             | None    | 97     | 99     | 910                           | 1,090   | PD                      | Alive, 1,150               |  |  |

CR, complete response; DLI, donor lymphocyte infusions; Exten., extensive; F, female; GVHD, graft versus host disease; M, male; PD, progressive disease; PR, partial response; Pt, patient; SPN, Stanford patient number; tCLL, transformed CLL; Unrel., unrelated.
